# Supplementary material for: Supporting diversity in clinical trials: the equitable breakthroughs in medicine site maturity model
Source: PubMed Central journal article supplement (PMC11566401; doi:10.1186/s13063-024-08594-9), 2024-11-14

**Figure 5: Process to complete the site maturity assessment**

# Illustrative example: Process to complete the site maturity assessment

**Illustrative example**  
Community engagement: Site Maturity Assessment Results (3/6)

**Illustrative example**  
Community engagement: Site Maturity Assessment Results (2/6)

**Illustrative example**  
Community engagement factors: Site Maturity Assessment Results (1/6)

**Programs addressing barriers to participation**

Maturity level: Developing, Strengthening, Leading

**Questions to ask site**

**Bi-directional community partnerships**

Maturity level: Developing, Strengthening, Leading

**Questions to ask site representative**

| Question                                                                                                                                                                                    | Developing                                                                                                                     | Strengthening                                                                                                                                         | Leading                                                                                                                                                                                                                                                                                                                      | Summary of site responses                                                                                                                                                                                                                                                                                                                                          |
|---------------------------------------------------------------------------------------------------------------------------------------------------------------------------------------------|--------------------------------------------------------------------------------------------------------------------------------|-------------------------------------------------------------------------------------------------------------------------------------------------------|------------------------------------------------------------------------------------------------------------------------------------------------------------------------------------------------------------------------------------------------------------------------------------------------------------------------------|--------------------------------------------------------------------------------------------------------------------------------------------------------------------------------------------------------------------------------------------------------------------------------------------------------------------------------------------------------------------|
| Does your organization partner with community organizations and/or patient advocacy groups? If so, about how many partnerships are in place? Are they focused on clinical trial activities? | Zero to few (<3) formal partnership with community organizations and / or patient advocacy groups for clinical trials research | Some (3-10) formal partnerships with community organizations and/or patient advocacy groups; may or may not be specific to clinical trials / research | Many (10+) robust, formal partnerships with community organizations and / or patient advocacy groups for clinical trials / research                                                                                                                                                                                          | Over 45 partnerships across organizations (e.g., regional community and public service, health and social services, faith-based, Black advocacy / service organizations, and others) with opportunity for partners to directly contact the site through a publicly-facing website form. However, not all are involved in clinical trials, so there is room to grow |
| How would you describe the level of engagement with community partners (e.g., is the work bidirectional, how long have the partnerships been in place, what types of programs do they run)? | Partners are rarely engaged                                                                                                    | Community partners are routinely engaged in program planning, design, and delivery                                                                    | Actively engages community partners in program planning, strategic growth, and advising on research priorities. Showcases community-led efforts within clinical trials to address their unique perspectives and needs                                                                                                        | Community engagement team regularly facilitates connections between researchers and community partners to ensure mutual fit with opportunities to increase activities across some partners                                                                                                                                                                         |
| Do you have examples of bidirectional work that has had a measurable impact in some way?                                                                                                    | Zero to few examples of bidirectional work with community partners                                                             | Some examples of bidirectional work with community partners                                                                                           | Demonstrates bidirectional work with community partners, including measurable impact (e.g., trial enrollment rates for Black, Hispanic & Latino participants, vaccination rates, access to diagnostic tests). Highlights community influence on the research agenda, fostering more inclusive and responsive clinical trials | Frequent bi-directional engagement events with community partners, particularly events hosted by community partners where site is invited; opportunity for additional bi-directional relationships focused on clinical research                                                                                                                                    |

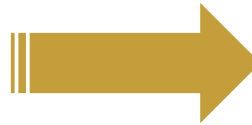

**Illustrative example: Completed site maturity assessment**

Maturity level: Developing, Strengthening, Leading

| Factor                                 | Component                                     | Current state maturity level | Goals for discussion...                                                                                                                                                                                                                                                                                                                                          |
|----------------------------------------|-----------------------------------------------|------------------------------|------------------------------------------------------------------------------------------------------------------------------------------------------------------------------------------------------------------------------------------------------------------------------------------------------------------------------------------------------------------|
| Organizational level factors           | Organizational leadership & governance        | Developing                   | Senior leadership voices commitment to increasing diversity in clinical trials; opportunity to formalize strategic initiatives and dedicate long-term funding                                                                                                                                                                                                    |
| Community engagement factors           | Bi-directional community partnerships         | Strengthening                | Has robust community partnerships and involves community members in advisory board, project-specific patient advisory groups. Opportunity to develop formal charter on community co-leadership and bi-directional partnership                                                                                                                                    |
|                                        | Programs addressing barriers to participation | Developing                   | Has some programming and supports to increase diverse participation in trials (e.g., transportation / time compensation); opportunity to establish formal trusted messenger models and expand participant supports (e.g., childcare)                                                                                                                             |
|                                        | Community input                               | Strengthening                | Has community members required on the IRB; community partnership group regularly gathers input on trial design; opportunity to establish formal policies for regular use of feedback and involve the community earlier on in research process                                                                                                                    |
|                                        | Communication with community & participants   | Developing                   | Spanish-speaking coordinators and recruitment materials available in Spanish; opportunity to expand translation capabilities and tailor with cultural framing in mind – especially sponsor-designed material                                                                                                                                                     |
| Clinical trial operations capabilities | Team science approach to workforce diversity  | Strengthening                | Informal mentorship of clinical research staff; limited examples of coes providing resources to researchers to protect time and ensure sustainability                                                                                                                                                                                                            |
|                                        | Clinical trial workforce DEIA education       | Strengthening                | Has HR-led cultural competency trainings for new coordinators and clinical trial staff participate in trial-specific community engagement events. Opportunity to bolster cultural humility and familiarity training offerings and expand requirements for staff                                                                                                  |
|                                        | Physical infrastructure                       | Developing                   | Has sufficient dedicated physical space for trials, adequate ancillary services, access to research equipment to support trials                                                                                                                                                                                                                                  |
|                                        | Technical infrastructure                      | Developing                   | Has no CTMS system in place for clinical research and limited ePRO/REMR use for patient recruitment                                                                                                                                                                                                                                                              |
|                                        | Research operations                           | Developing                   | Has opportunities such as updating SOPs and training staff; establishing processes such as trial procurement and feasibility, patient retention; enhancing data management and regulatory processes; expanding types of trials; defining performance tracking & QA efforts                                                                                       |
|                                        | Site composition                              | Strengthening                | Conducts trials across several therapeutic areas, has multiple active and experienced investigators, multiple full and part time CRCs, staff with capacity for more trials, and emerging processes and supports (e.g., regulatory, financial). Opportunity to bolster clinical trial partnerships, expand satellite sites, and dedicate positions for data entry |

**Detailed deep dives of maturity assessment by question**

**Example synthesis of completed maturity assessment by component, for discussion with site to co-develop goals**

# Illustrative example: Completed site maturity assessment

Developing
  Strengthening
  Leading

| Factor                                 | Component                                     | Current state maturity level                                                                                                                                                                                                                                                                                                                                                                                                                                       | Goals for discussion...                                                                                                                                                                                                                                                                                                                                                        |
|----------------------------------------|-----------------------------------------------|--------------------------------------------------------------------------------------------------------------------------------------------------------------------------------------------------------------------------------------------------------------------------------------------------------------------------------------------------------------------------------------------------------------------------------------------------------------------|--------------------------------------------------------------------------------------------------------------------------------------------------------------------------------------------------------------------------------------------------------------------------------------------------------------------------------------------------------------------------------|
| Organizational level factors           | Organizational leadership & governance        | <span style="display: inline-block; width: 100px; height: 15px; background-color: #c4a037;"></span> Senior leadership voices commitment to increasing diversity in clinical trials; opportunity to formalize strategic initiatives and dedicate long-term funding                                                                                                                                                                                                  | <div style="display: flex; align-items: center;"> <div style="border: 1px solid black; border-radius: 50%; width: 20px; height: 20px; display: flex; align-items: center; justify-content: center; margin-right: 10px;"> <span style="font-size: 12px;">&gt;</span> </div> <div> <ul style="list-style-type: none"> <li>• Co-develop with the site...</li> </ul> </div> </div> |
|                                        | Bi-directional community partnerships         | <span style="display: inline-block; width: 100px; height: 15px; background-color: #6b5a21;"></span> Has robust community partnership and involves community members in advisory board, project-specific patient advisory groups; Opportunity to develop formal charter on community co-leadership and bi-directional partnership                                                                                                                                   |                                                                                                                                                                                                                                                                                                                                                                                |
|                                        | Programs addressing barriers to participation | <span style="display: inline-block; width: 100px; height: 15px; background-color: #c4a037;"></span> Has some programming and supports to increase diverse participation in trials the importance of community engagement in research (e.g., transportation / time compensation); opportunity to establish formal trusted messenger models and expand participant supports (e.g., childcare)                                                                        |                                                                                                                                                                                                                                                                                                                                                                                |
|                                        | Community input                               | <span style="display: inline-block; width: 100px; height: 15px; background-color: #6b5a21;"></span> Has community members required on the IRB; community partnership group regularly gathers input on trial design; opportunity to establish formal policies for regular use of feedback and involve the community earlier on in research process                                                                                                                  |                                                                                                                                                                                                                                                                                                                                                                                |
|                                        | Communication with community & participants   | <span style="display: inline-block; width: 100px; height: 15px; background-color: #f0e68c;"></span> Spanish-speaking coordinators and recruitment materials available in Spanish; opportunity to expand translation capabilities and tailor with cultural framing in mind – especially sponsor-designed material                                                                                                                                                   |                                                                                                                                                                                                                                                                                                                                                                                |
|                                        | Team science approach to workforce diversity  | <span style="display: inline-block; width: 100px; height: 15px; background-color: #c4a037;"></span> Informal mentorship of clinical research staff; limited examples of cores providing resources to researchers to protect time and ensure sustainability                                                                                                                                                                                                         |                                                                                                                                                                                                                                                                                                                                                                                |
| Community engagement factors           | Clinical trial workforce DEIA education       | <span style="display: inline-block; width: 100px; height: 15px; background-color: #c4a037;"></span> Has HR-led cultural competency trainings for new coordinators and clinical trial staff participate in trial-specific community engagement events. Opportunity to bolster cultural humility and familiarity training offerings and expand requirements for staff                                                                                                | <ul style="list-style-type: none"> <li>• Co-develop with the site...</li> </ul>                                                                                                                                                                                                                                                                                                |
|                                        | Physical infrastructure                       | <span style="display: inline-block; width: 100px; height: 15px; background-color: #c4a037;"></span> Has sufficient dedicated physical space for trials, adequate ancillary services, access to research equipment to support trials                                                                                                                                                                                                                                |                                                                                                                                                                                                                                                                                                                                                                                |
|                                        | Technical infrastructure                      | <span style="display: inline-block; width: 100px; height: 15px; background-color: #f0e68c;"></span> Has no CTMS system in place for clinical research and limited EHR/EMR use for patient recruitment                                                                                                                                                                                                                                                              |                                                                                                                                                                                                                                                                                                                                                                                |
|                                        | Research operations                           | <span style="display: inline-block; width: 100px; height: 15px; background-color: #f0e68c;"></span> Has opportunities such as updating SOPs and training staff; establishing processes such as trial procurement and feasibility, patient retention; enhancing data management and regulatory processes; expanding types of trials; defining performance tracking & QA efforts                                                                                     |                                                                                                                                                                                                                                                                                                                                                                                |
| Clinical trial operations capabilities | Site composition                              | <span style="display: inline-block; width: 100px; height: 15px; background-color: #c4a037;"></span> Conducts trials across several therapeutic areas, has multiple active and experienced investigators, multiple full and part time CRCs, staff with capacity for more trials, and emerging processes and supports (e.g., regulatory, finance). Opportunity to bolster clinical trial partnerships, expand satellite sites, and dedicate positions for data entry | <ul style="list-style-type: none"> <li>• Co-develop with the site...</li> </ul>                                                                                                                                                                                                                                                                                                |

# Illustrative example: Completed site maturity assessment

Developing
  Strengthening
  Leading

| Factor                                 | Component                                     | Maturity level | Goals co-developed with the site                                                                                                                                                                                                                                                                                                                                   |
|----------------------------------------|-----------------------------------------------|----------------|--------------------------------------------------------------------------------------------------------------------------------------------------------------------------------------------------------------------------------------------------------------------------------------------------------------------------------------------------------------------|
| Organizational level factors           | Organizational leadership & governance        |                | <ul style="list-style-type: none"> <li>Expand leadership capacity to develop an organization-wide strategic plan to advance diversity in clinical trials</li> </ul>                                                                                                                                                                                                |
| Community engagement factors           | Bi-directional community partnerships         |                | <ul style="list-style-type: none"> <li>Create opportunities community partners to shape research priorities from the outset</li> <li>Create formal mentorship and training opportunities for Black, Hispanic &amp; Latino clinical research staff</li> <li>Consider opportunities to mentor other organizations on community engagement and partnership</li> </ul> |
|                                        | Programs addressing barriers to participation |                |                                                                                                                                                                                                                                                                                                                                                                    |
|                                        | Community input                               |                |                                                                                                                                                                                                                                                                                                                                                                    |
|                                        | Communication with community & participants   |                |                                                                                                                                                                                                                                                                                                                                                                    |
|                                        | Team science approach to workforce diversity  |                |                                                                                                                                                                                                                                                                                                                                                                    |
|                                        | Clinical trial workforce DEIA education       |                |                                                                                                                                                                                                                                                                                                                                                                    |
| Clinical trial operations capabilities | Physical infrastructure                       |                | <ul style="list-style-type: none"> <li>Integrate clinical research technology into provider workflows to streamline management of clinical research</li> <li>Formalize research SOPs and establish a streamlined process to manage and update these as needed</li> </ul>                                                                                           |
|                                        | Technical infrastructure                      |                |                                                                                                                                                                                                                                                                                                                                                                    |
|                                        | Research operations                           |                |                                                                                                                                                                                                                                                                                                                                                                    |
|                                        | Site composition                              |                |                                                                                                                                                                                                                                                                                                                                                                    |

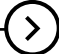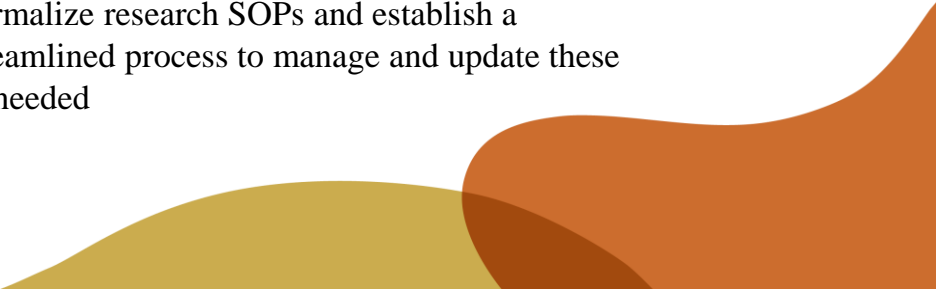

Supplement: 13063_2024_8594_MOESM1_ESM.pdf [file 13063_2024_8594_MOESM1_ESM.pdf]
